# Supplementary material for: Clinical usefulness of the SAMe-TT2R2 score: A systematic review and simulation meta-analysis
Source: PLOS journal article supplement (doi:10.1371/journal.pone.0194208), 2018-03-13
Supplement: S2 (10.1371/journal.pone.0194208.s002) [file journal.pone.0194208.s002]

# Clinical usefulness of the SAME-TT<sub>2</sub>R<sub>2</sub> score

## A systematic review and simulation meta-analysis

J.H.A. van Miert, S. Bos, N.J.G.M. Veeger, K. Meijer

S1 Table: Quality assessment of studies.

| STUDY                  | RISK OF BIAS         |               |                       |                    | APPLICABILITY CONCERNS |               |                       |
|------------------------|----------------------|---------------|-----------------------|--------------------|------------------------|---------------|-----------------------|
|                        | PATIENT<br>SELECTION | INDEX<br>TEST | REFERENCE<br>STANDARD | FLOW AND<br>TIMING | PATIENT<br>SELECTION   | INDEX<br>TEST | REFERENCE<br>STANDARD |
| <b>Abumuaileq [19]</b> | High                 | Unclear       | Unclear               | Low                | Low                    | Low           | Unclear               |
| <b>Apostolakis [8]</b> | High                 | N/A           | Unclear               | Unclear            | Unclear                | N/A           | Low                   |
| <b>Bernaitis [20]</b>  | Unclear              | Unclear       | Unclear               | Unclear            | Low                    | Low           | Unclear               |
| <b>Chan [21]</b>       | Unclear              | Low           | Unclear               | Unclear            | Unclear                | Low           | Low                   |
| <b>Demelo [22]</b>     | Low                  | Unclear       | Low                   | Low                | Low                    | Low           | Low                   |
| <b>Gallego [23]</b>    | High                 | Unclear       | Low                   | Unclear            | Unclear                | Low           | High                  |
| <b>Gorzelak [24]</b>   | Unclear              | Unclear       | Unclear               | Unclear            | Low                    | Low           | Low                   |
| <b>Lip [25]</b>        | Unclear              | Unclear       | High                  | Unclear            | Low                    | High          | High                  |
| <b>Lobos [26]</b>      | Low                  | Unclear       | Unclear               | Unclear            | Low                    | Low           | Low                   |
| <b>Palareti [27]</b>   | Low                  | Unclear       | Unclear               | Unclear            | Low                    | Low           | Low                   |
| <b>Park [28]</b>       | Low                  | Unclear       | Unclear               | Unclear            | Unclear                | Low           | Low                   |
| <b>Poli [29]</b>       | Low                  | Unclear       | Unclear               | Unclear            | Unclear                | Low           | Low                   |
| <b>Proietti [30]</b>   | High                 | Unclear       | Unclear               | Unclear            | Unclear                | High          | High                  |
| <b>Roldan [31]</b>     | Low                  | Low           | Low                   | Low                | Low                    | Low           | Low                   |
| <b>Ruiz [32]</b>       | Unclear              | Unclear       | Unclear               | Unclear            | Low                    | Low           | Unclear               |
| <b>Szymanski [33]</b>  | Unclear              | Unclear       | Unclear               | Unclear            | Unclear                | Low           | Unclear               |

According to the QUADAS-2. [15]
